# Supplementary material for: Database of summer fish fauna sampled in river estuaries in the southern part of the Boso Peninsula, Japan
Source: Biodivers Data J. 2021 Jun 29;9:e67168. doi: 10.3897/BDJ.9.e67168 (PMC8260558; doi:10.3897/BDJ.9.e67168)
Supplement: Supplementary material 1 — List of populations of fish species from 27 rivers in the southern part of the Boso Peninsula, Japan [file bdj-09-e67168-s001.xlsx]

## Sheet: Supplementary.1
Scientific name	Habitat	Life history	Iwase. R	Kokubo.R	Some. R	Motona. R	Kanaya. R	Hota. R	Sakuma. R	Shinden. R	Okamoto. R	Tomoe. R	Nagao. R	Kawaguchi. R	Kawajiri. R	Seto. R	Maruyama. R	Onjaku. R	Mihara. R	Chouja. R	Sugai. R	Soro. R	Kamo. R	Machizaki. R	Shinmei. R	Oobizo. R	Okitsu. R	Shimizu. R	Shioda. R
Microphis brachyurus	estuarine	diadromous																			3
Anguilla japonica	freshwater and estuarine	diadromous											1					2										1
Platichthys bicoloratus	marine and estuarine	resident			1
Sillago japonica	marine and estuarine	resident		2																			4
Mugil cephalus	marine and estuarine	resident	15	49	23	6	98	65	162	23	77	1	9	28	121	57	48	79	118	74	32	13	54	93	46	84	17	53	47
Planiliza macrolepis	marine and estuarine	resident				1													1	1	1	3
Nuchequula nuchalis	marine and estuarine	resident		18																								1
Terapon jarbua	marine and estuarine	resident				1						3	4	15	11			1	86		72		35		1	116	12	138	43
Rhyncopelates oxyrhynchus	marine and estuarine	resident					1								1		2	3
Gerres equulus	marine and estuarine	resident																									3
Plotosus japonicus	marine and estuarine	resident									4
Paraplagusia japonica	marine	resident	4																										2
Hemitrygon akajei	marine	resident	1
Plectorhinchus cinctus	marine and estuarine	resident	6				2		4	1	3	1				1
Platycephalus sp. sensu Nakabo & Kai, 2013	marine and estuarine	resident			2							1												1		1			2
Takifugu alboplumbeus	marine	resident	3	2	19		5	2	1	1	2	4				6								39			17		11
Scomberoides lysan	marine and estuarine	resident																					1
Caranx sexfasciatus	marine and estuarine	resident		2								1	4		2	2		1	1				11	3		2	5
Caranx ignobilis	marine and estuarine	resident	2								1				6	6			1		1
Favonigobius gymnauchen	marine and estuarine	resident	1				1		2														1
Acanthogobius flavimanus	marine and estuarine	resident	7	1	5	1		1	3		25		1		25	1				1		7	1	21	5	32		3	8
Acanthogobius lactipes	marine and estuarine	resident			1					1										33
Tridentiger obscurus	freshwater and estuarine	diadromous			68	1	6	5	4		16	7	2				2			18							1
Chaenogobius annularis	marine and estuarine	resident			37		8			1		6		3						4			18		1
Tridentiger trigonocephalus	marine and estuarine	resident		2	1
Bathygobius sp. (unidentified)	marine and estuarine	resident					1
Luciogobius sp. (unidentified)	freshwater, estuarine, and marine	diadromous					1
Luciogobius guttatus	freshwater, estuarine, and marine	diadromous											1
Rhinogobius nagoyae	freshwater	diadromous											7
Sicyopterus japonicus	freshwater	diadromous											18
Tridentiger brevispinis	freshwater and estuarine	diadromous															1
Rhinogobius similis	freshwater and estuarine	diadromous								2		3
Eleotris oxycephala	freshwater and estuarine	diadromous					2					1						26		1					3
Lateolabrax japonicus	freshwater, estuarine, and marine	diadromous	1
Stephanolepis cirrhifer	marine	resident							1
Triacanthus biaculeatus	marine	resident							1		1
Konosirus punctatus	marine and estuarine	resident						3	2
Acanthopagrus schlegelii	marine and estuarine	resident						6	2				3					1									5
Rhabdosargus sarba	marine and estuarine	resident																					4
Acanthopagrus latus	marine and estuarine	resident									1
Lutjanus fulvus	marine and estuarine	resident										1																1
Lutjanus russellii	marine and estuarine	resident						2																			1	1
Lutjanus argentimaculatus	marine and estuarine	resident			1													5										2
Paralichthys olivaceus	marine and estuarine	resident							1
Pseudaspius hakonensis	freshwater, estuarine, and marine	diadromous					45													24
Cyprinus carpio	freshwater, estuarine	resident														8	5	5										3
Zacco platypus	freshwater	resident											1
Carassius auratus	freshwater	resident											1
Chanos chanos	freshwater, estuarine, and marine	resident																		1	1
Oryzias latipes	freshwater	resident															15
Plecoglossus altivelis	freshwater	diadromous											7
Number of fish species			9	7	10	5	11	7	11	6	9	11	13	3	6	7	6	9	5	9	6	3	9	5	5	5	8	9	6
Number of individuals			40	76	158	10	170	84	183	29	130	29	59	46	166	81	73	123	207	157	110	23	129	157	56	235	61	203	113
